# Supplementary material for: Experimental and Theoretical Mechanistic Study on the Thermal Decomposition of 3,3-diphenyl-4-(trichloromethyl)-5-nitropyrazoline
Source: PubMed Central journal article supplement (PMC7961919; doi:10.3390/molecules26051364), 2021-03-04
Supplement: molecules-26-01364-s001.pdf [file molecules-26-01364-s001.pdf]

## Supporting Information

### Experimental and Theoretical Mechanistic Study on the Thermal Decomposition of 3,3-diphenyl-4-(trichloromethyl)-5-nitropyrazoline

Karolina Kula <sup>1</sup>, Agnieszka Kaćka-Zych <sup>1</sup>, Agnieszka Łapczuk-Krygier <sup>1</sup>, Zbigniew Wzorek <sup>2</sup>, Anna Nowak <sup>2</sup> and Radomir Jasiński <sup>1,\*</sup>

<sup>1</sup> Department of Organic Chemistry and Technology, Cracow University of Technology, Warszawska 24, 31-155 Cracow, Poland

<sup>2</sup> Institute of Inorganic Chemistry and Technology, Cracow University of Technology, Warszawska 24, 31-155 Cracow, Poland

**Table S1.** MPWB1K(PCM)/6-311G(d,p) ELF valence basin populations, distances of the breaking and forming bonds and relative<sup>a</sup> electronic energies of the IRC points, P1 – 4, defining the six different phases characterizing the reaction of the dehydrochlorination of **3**. The stationary points **3**, **TS** and **4** are also included. Distances are given in angstroms, Å, electron populations in average number of electrons, e, relative energies in kcal·mol<sup>-1</sup>.

| Structures      | <b>3</b> | <b>P1</b> | <b>P2</b> | <b>TS</b>  | <b>P3</b> | <b>P4</b> | <b>P5</b> | <b>4</b> |
|-----------------|----------|-----------|-----------|------------|-----------|-----------|-----------|----------|
| Phases          |          | <i>I</i>  | <i>II</i> | <i>III</i> | <i>IV</i> | <i>V</i>  | <i>VI</i> |          |
| d(C4-H6)        | 2.128    | 2.127     | 2.143     | 2.170      | 2.787     | 2.991     | 3.412     | 6.706    |
| d(C4-C7)        | 2.929    | 2.931     | 2.899     | 2.781      | 2.657     | 2.642     | 2.563     | 2.515    |
| d(C7-Cl8)       | 3.455    | 3.459     | 3.903     | 5.801      | 6.049     | 6.029     | 6.013     | 6.449    |
| d(H6-Cl8)       | 5.248    | 4.689     | 4.564     | 4.160      | 3.114     | 2.923     | 2.641     | 2.523    |
| ΔE <sup>a</sup> |          | 0.0       | 12.3      | 41.9       | 35.7      | 18.5      | 5.6       | 2.4      |
| V(C4,H6)        | 2.02     | 2.02      | 2.01      | 1.95       |           |           |           |          |
| V(C4)           |          |           |           |            | 0.86      | 0.75      |           |          |
| V(H6)           |          |           |           |            | 0.77      |           |           |          |
| V(C4,C7)        | 2.08     | 2.09      | 2.10      | 2.33       | 2.86      | 3.05      | 1.95      | 2.05     |
| V'(C4,C7)       |          |           |           |            |           |           | 1.93      | 1.90     |
| V(C7)           |          |           | 0.79      |            |           |           |           |          |
| V(C7,Cl8)       | 1.54     | 1.56      |           |            |           |           |           |          |
| V(Cl8)          | 2.35     | 2.36      | 2.81      | 4.04       | 6.93      | 6.74      | 6.43      | 6.34     |
| V'(Cl8)         | 1.91     | 1.90      | 1.89      | 3.65       | 0.55      |           |           |          |
| V''(Cl8)        | 2.10     | 2.12      | 1.98      |            |           |           |           |          |
| V(H6,Cl8)       |          |           |           |            |           | 1.34      | 1.63      | 1.64     |

<sup>a</sup>Relative to the first point of the IRC, **P1**.
